# Supplementary material for: Late weaning is associated with increased microbial diversity and Faecalibacterium prausnitzii abundance in the fecal microbiota of piglets
Source: PubMed Central journal article supplement (PMC7807523; doi:10.1186/s42523-020-0020-4), 2020-01-16

Figure S3: Venn diagram showing the overlap in the differentially abundant OTUs before and after weaning for each weaning group.

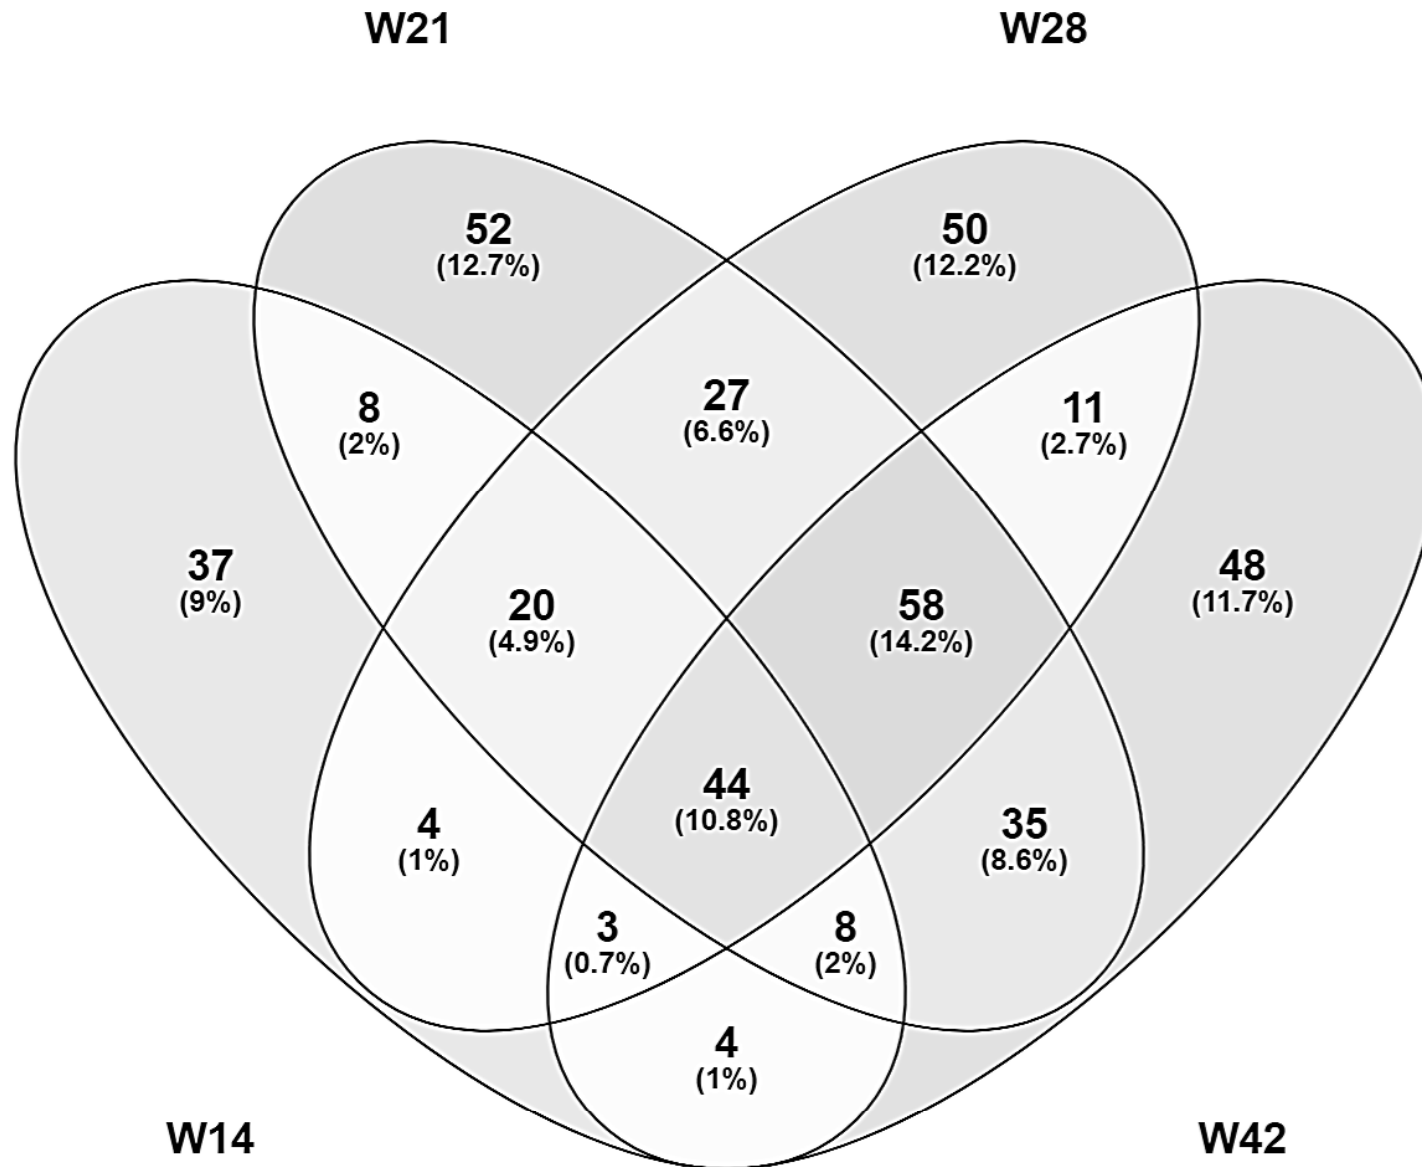

Supplement: 42523_2020_20_MOESM3_ESM.pdf [file 42523_2020_20_MOESM3_ESM.pdf]
